# Supplementary material for: Understanding empathy deficits and emotion dysregulation in psychopathy: The mediating role of alexithymia
Source: PLoS One. 2024 May 8;19(5):e0301085. doi: 10.1371/journal.pone.0301085 (PMC11078418; doi:10.1371/journal.pone.0301085)
Supplement: S3 Table — Results are presented for the community sample (N = 315). Bias-corrected percentile bootstrap confidence intervals (N = 5000). Maximum likelihood estimator. *p < .05; **p < .01; ***p < .001. (DOCX) [file pone.0301085.s003.docx]

**S3 Table. Results of mediation analyses for psychopathy factors, alexithymia, empathy, and reappraisal in the community sample.**

| **Independent Variable (IV)** | **Mediating Variable (M)** | **Dependent Variables (DV)** | **Effect of IV on M (a)** | **Effect of M on DV (b)** | **Direct Effect  (c‘)** | **Total Effect  (c)** | **Indirect effect  (a)(b) [95% CI]** | **Effect size *abcs*** |
| --- | --- | --- | --- | --- | --- | --- | --- | --- |
| Meanness | Alexithymia | Empathy | .435*** | –.088* | –.515*** | –.553*** | –.038 [–.092; –.009]* | –.006* |
| Reappraisal | .435*** | –.023*** | –.033*** | –.043*** | –.010 [–.019; –.004]** | –.009** |
| Boldness | Alexithymia | Empathy | –.287*** | –.088* | .101* | .0126** | .025 [.005; .062]* | .004* |
| Reappraisal | –.287*** | –.023*** | .016* | .023** | .007 [.002; .013]** | .006** |
| Disinhibition | Alexithymia | Empathy | .563*** | –.088* | .0186*** | .0137* | –.050 [–.106; –.015]* | –.007* |
| Reappraisal | .563*** | –.023*** | .012 | –.001 | –.013 [–.025; –.006]*** | –.012*** |

Results are presented for the community sample (*N* = 315). Bias-corrected percentile bootstrap confidence intervals (*N* = 5000). Maximum likelihood estimator.

**p* < .05; ***p* < .01; ****p* < .001.
